# Supplementary material for: Retrospective Analysis of Blood Biomarkers of Neurological Injury in Human Cases of Viral Infection and Bacterial Sepsis
Source: bioRxiv or medRxiv preprint supplement (doi:10.1101/2024.01.05.24300906), 2024-01-07
Supplement: Supplementary file [file media-1.pdf]

## Supplemental Tables

Supplemental Table 1. Human cases of acute alphavirus infection for group 1 virus infection study population.

| Virus       |                                                          | MADV Previous Exposure <sup>3</sup> | MADV Naïve <sup>4</sup> | VEEV Previous Exposure <sup>3</sup> | VEEV Naïve <sup>4</sup> | Total |
|-------------|----------------------------------------------------------|-------------------------------------|-------------------------|-------------------------------------|-------------------------|-------|
| <b>Both</b> | MADV and VEEV Confirmed <sup>1</sup>                     | N/A                                 | N/A                     | N/A                                 | N/A                     | 0     |
|             | VEEV Confirmed <sup>1</sup> and MADV Likely <sup>2</sup> | N/A                                 | N/A                     | N/A                                 | N/A                     | 2     |
|             | MADV and VEEV Likely <sup>2</sup>                        | N/A                                 | N/A                     | N/A                                 | N/A                     | 1     |
| <b>MADV</b> | MADV Confirmed <sup>1</sup>                              | N/A                                 | N/A                     | 1                                   | 1                       | 2     |
|             | MADV Likely <sup>2</sup>                                 | N/A                                 | N/A                     | 3                                   | 3                       | 6     |
| <b>VEEV</b> | VEEV Confirmed <sup>1</sup>                              | 15                                  | 2                       | N/A                                 | N/A                     | 17    |
|             | VEEV Likely <sup>2</sup>                                 | 2                                   | 3                       | N/A                                 | N/A                     | 5     |

<sup>1</sup> Confirmed infection determined by IgM and PRNT positivity.

<sup>2</sup> Likely infection determined by either IgM or PRNT positivity, but not both.

<sup>3</sup> Previous exposure determined by IgG positivity.

<sup>4</sup> Naïve indicates no antibodies detected.

Supplemental Table 2. Associations between group 1 virus infection subgroups and biomarkers.

| Protein | Infection        | Adj variance | z      | P-value |
|---------|------------------|--------------|--------|---------|
| GFAP    | Acute alphavirus | 8119.16      | -3.474 | 0.0005  |
|         | Acute MADV       | 3875.05      | -2.940 | 0.0033  |
|         | Acute VEEV       | 6511.54      | -1.834 | 0.0513  |
| UCH-L1  | Acute alphavirus | 8139.75      | 3.486  | 0.0005  |
|         | Acute MADV       | 3884.88      | -0.610 | 0.5421  |
|         | Acute VEEV       | 7535.43      | 4.810  | <0.0001 |

Wilcoxon rank-sum tests of GFAP/UCHL1 and alphaviral status
