# Supplementary material for: Retrospective Analysis of Blood Biomarkers of Neurological Injury in Human Cases of Viral Infection and Bacterial Sepsis
Source: bioRxiv or medRxiv preprint supplement (doi:10.1101/2024.01.05.24300906), 2024-01-07
Supplement: Supplementary file [file media-2.pdf]

Supplementary Data 1: Group 2 and 3

| ID               | Original Diagnosis                                                      | Additional Diagnosis                    | Country  | Group(s) |
|------------------|-------------------------------------------------------------------------|-----------------------------------------|----------|----------|
| 01C01 008        | CNS Infection                                                           | None                                    | Cambodia | 2        |
| 01C01 015        | CNS Infection                                                           | None                                    | Cambodia | 2        |
| 01C01 038        | CNS Infection                                                           | None                                    | Cambodia | 2        |
| 01C01 062        | CNS Infection                                                           | None                                    | Cambodia | 2        |
| 01C01 085        | CNS Infection                                                           | None                                    | Cambodia | 2        |
| 01C01 099        | CNS Infection                                                           | None                                    | Cambodia | 2        |
| 01C01 107        | CNS Infection                                                           | None                                    | Cambodia | 2        |
| 01C01 114        | CNS Infection                                                           | None                                    | Cambodia | 2        |
| 01C01 131        | CNS Infection                                                           | None                                    | Cambodia | 2        |
| 01C01 175        | CNS Infection                                                           | None                                    | Cambodia | 2        |
| 01C01 195        | CNS Infection                                                           | None                                    | Cambodia | 2        |
| 01G01 0015       | CNS Infection                                                           | None                                    | Ghana    | 2&3      |
| 01G01 0074       | CNS Infection                                                           | None                                    | Ghana    | 2        |
| 01G01 0079       | CNS Infection                                                           | None                                    | Ghana    | 2        |
| 01G01 0085       | CNS Infection                                                           | None                                    | Ghana    | 2        |
| 01G01 0108       | CNS Infection                                                           | None                                    | Ghana    | 2        |
| 01G01 0123       | CNS Infection                                                           | None                                    | Ghana    | 2        |
| 01G01 0143       | CNS Infection                                                           | None                                    | Ghana    | 2        |
| 01G01 0152       | CNS Infection                                                           | None                                    | Ghana    | 2        |
| 01G01 0153       | CNS Infection                                                           | None                                    | Ghana    | 2        |
| 01G01 0182       | CNS Infection                                                           | None                                    | Ghana    | 2        |
| 01C01 187        | Fungemia, GU or Reproductive Infection                                  | Escherichia coli                        | Cambodia | 2        |
| 01C01 030        | GI Tract Infections                                                     | Escherichia coli, Proteus               | Cambodia | 2        |
| 01C01 052        | GI Tract Infections                                                     | Escherichia coli, Kleb pneumo           | Cambodia | 2        |
| 01C01 057        | GI Tract Infections                                                     | Orientia tsutsugamushi                  | Cambodia | 2        |
| 01G01 0136       | HEENT or Oral Cavity Infection                                          | ENTEROBACTER AEROGENES                  | Ghana    | 2        |
| 01C01 033        | Respiratory Tract Infection                                             | Staphylococcus aureus                   | Cambodia | 2        |
| 01C01 045        | Respiratory Tract Infection                                             | Orientia tsutsugamushi                  | Cambodia | 2        |
| 01C01 102        | Respiratory Tract Infection                                             | Klebsiella pneumoniae                   | Cambodia | 2        |
| 01C01 123        | Respiratory Tract Infection                                             | Enterobacter spp., S. aureus            | Cambodia | 2        |
| 01C01 166        | Respiratory Tract Infection                                             | Orientia tsutsugamushi                  | Cambodia | 2        |
| 01C01 189        | Respiratory Tract Infection                                             | Haemophilus influenzae, Klebsiella pnei | Cambodia | 2        |
| 01G01 0028       | Respiratory Tract Infection                                             | None                                    | Ghana    | 2&3      |
| 01C01 111        | Unknown Source/Infection                                                | Haemophilus influenzae                  | Cambodia | 2        |
| 01C01 168        | Unknown Source/Infection                                                | Orientia tsutsugamushi                  | Cambodia | 2        |
| 01G01 0012       | unknown source/infection                                                | None                                    | Ghana    | 2&3      |
| 01G01 0017       | unknown source/infection                                                | None                                    | Ghana    | 2&3      |
| 01C01 152        | Bacteremia                                                              | Klebsiella pneumoniae                   | Cambodia | 2        |
| 01G01 0026       | Bacteremia                                                              | SALMONELLA SPP. ISOLATED                | Ghana    | 2        |
| 01G01 0086       | Bacteremia                                                              | METHICILLIN-RESISTANT STAPHYLCO         | Ghana    | 2&3      |
| 01G01 0050       | Bacteremia                                                              | None                                    | Ghana    | 2&3      |
| 01C01 054        | Bacteremia AND Unknown Source/Infection                                 | Orientia tsutsugamushi                  | Cambodia | 2        |
| 01C01 089        | Bacteremia, Cellulitis/Abscess/Skin/bone/ Joint Infection               | Staphylococcus aureus                   | Cambodia | 2        |
| 01G01 0048       | Bacteremia, Cellulitis/Abscess/Skin/bone/ Joint Infection               | None                                    | Ghana    | 2&3      |
| 01G01 0175       | Bacteremia, Cellulitis/Abscess/Skin/bone/ Joint Infection               | STREPTOCOCCUS PYOGENES ISOL             | Ghana    | 2&3      |
| 01G01 0039       | Bacteremia, GU or Reproductive Infection                                | E-COLI                                  | Ghana    | 2&3      |
| 01G01 0070       | Bacteremia, GU or Reproductive Infection                                | STAPH AUREUS                            | Ghana    | 2        |
| 01C01 183        | Bacteremia, HEENT or Oral Cavity Infection, Respiratory Tract Infection | Klebsiella pneumoniae, Pseudomonas ε    | Cambodia | 2        |
| 01G01 0034       | Bacteremia, Respiratory Tract Infection                                 | STREPTOCOCCUS PNEUMONIAE                | Ghana    | 2        |
| 01G01 0008       | bacteremia                                                              | None                                    | Ghana    | 2        |
| 01C01 072        | Cardiovascular Infection                                                | Streptococcus pneumoniae                | Cambodia | 2        |
| 01G01 0139       | Cardiovascular Infection, Cellulitis/Abscess/Skin/bone/ Joint Infection | STREPTOCOCCUS PNEUMONIAE                | Ghana    | 2        |
| 01G01 0083       | Cellulitis/Abscess/Skin/bone/ Joint Infection                           | None                                    | Cambodia | 2        |
| 01G01000200hEP0# | Non-Infectious                                                          | Unknown                                 | Ghana    | 3        |
| 01G01000500hEP0# | GI Tract Infections                                                     | Unknown                                 | Ghana    | 3        |
| 01G01000700hEP0# | GI Tract Infections                                                     | Unknown                                 | Ghana    | 3        |
| 01G01000800hEP0# | Bacteremia                                                              | Unknown                                 | Ghana    | 3        |
| 01G01001000hEP0# | Non-Infectious                                                          | Unknown                                 | Ghana    | 3        |
| 01G01001100hEP0# | Cellulitis/Abscess/Skin/bone/ Joint Infection                           | Unknown                                 | Ghana    | 3        |
| 01G01001800hEP0# | Parasitemia                                                             | Unknown                                 | Ghana    | 3        |
| 01G01001900hEP0# | Cellulitis/Abscess/Skin/bone/ Joint Infection                           | Unknown                                 | Ghana    | 3        |
| 01G01002000hEP0# | Cellulitis/Abscess/Skin/bone/ Joint Infection                           | Unknown                                 | Ghana    | 3        |
| 01G01002500hEP0# | Parasitemia                                                             | Unknown                                 | Ghana    | 3        |
| 01G01002700hEP0# | Cellulitis/Abscess/Skin/bone/ Joint Infection                           | Unknown                                 | Ghana    | 3        |
| 01G01002900hEP0# | HEENT or Oral Cavity Infection                                          | Unknown                                 | Ghana    | 3        |
| 01G01003300hEP0# | GI Tract Infections, Respiratory Tract Infection                        | Unknown                                 | Ghana    | 3        |
| 01G01003800hEP0# | Respiratory Tract Infection                                             | Unknown                                 | Ghana    | 3        |
| 01G01004400hEP0# | GI Tract Infections                                                     | Unknown                                 | Ghana    | 3        |
| 01G01004500hEP0# | Respiratory Tract Infection                                             | Unknown                                 | Ghana    | 3        |
| 01G01005100hEP0# | Cellulitis/Abscess/Skin/bone/ Joint Infection                           | Unknown                                 | Ghana    | 3        |

|                  |                                                             |                |       |     |
|------------------|-------------------------------------------------------------|----------------|-------|-----|
| 01G01005300hEP0# | Unknown Source/Infection                                    | Unknown        | Ghana | 3   |
| 01G01005400hEP0# | Non-Infectious                                              | Unknown        | Ghana | 3   |
| 01G01005800hEP0# | Non-Infectious                                              | Unknown        | Ghana | 3   |
| 01G01006000hEP0# | Cellulitis/Abscess/Skin/bone/ Joint Infection               | Unknown        | Ghana | 3   |
| 01G01006100hEP0# | Respiratory Tract Infection                                 | Unknown        | Ghana | 3   |
| 01G01006400hEP0# | Cellulitis/Abscess/Skin/bone/ Joint Infection               | Unknown        | Ghana | 3   |
| 01G01006500hEP0# | Respiratory Tract Infection                                 | Unknown        | Ghana | 3   |
| 01G01006800hEP0# | GI Tract Infections, GU or Reproductive Infection           | Unknown        | Ghana | 3   |
| 01G01007100hEP0# | Non-Infectious                                              | Unknown        | Ghana | 3   |
| 01G01007300hEP0# | GI Tract Infections                                         | Unknown        | Ghana | 3   |
| 01G01007500hEP0# | GU or Reproductive Infection                                | Unknown        | Ghana | 3   |
| 01G01007800hEP0# | Cellulitis/Abscess/Skin/bone/ Joint Infection               | Unknown        | Ghana | 3   |
| 01G01008300hEP0# | GU or Reproductive Infection                                | Unknown        | Ghana | 3   |
| 01G01008900hEP0# | Non-Infectious                                              | Unknown        | Ghana | 3   |
| 01G01009300hEP0# | Cellulitis/Abscess/Skin/bone/ Joint Infection               | Unknown        | Ghana | 3   |
| 01G01009500hEP0# | GU or Reproductive Infection                                | Unknown        | Ghana | 3   |
| 01G01009600hEP0# | GU or Reproductive Infection                                | Unknown        | Ghana | 3   |
| 01G01010500hEP0# | Bacteremia, GU or Reproductive Infection                    | Unknown        | Ghana | 3   |
| 01G01011100hEP0# | Parasitemia                                                 | Unknown        | Ghana | 3   |
| 01G01011500hEP0# | Cellulitis/Abscess/Skin/bone/ Joint Infection               | Unknown        | Ghana | 3   |
| 01G01012500hEP0# | Respiratory Tract Infection                                 | Unknown        | Ghana | 3   |
| 01G01012800hEP0# | Respiratory Tract Infection                                 | Unknown        | Ghana | 3   |
| 01G01012900hEP0# | Unknown Source/Infection                                    | Unknown        | Ghana | 3   |
| 01G01013200hEP0# | Cellulitis/Abscess/Skin/bone/ Joint Infection               | Unknown        | Ghana | 3   |
| 01G01014400hEP0# | Parasitemia                                                 | Unknown        | Ghana | 3   |
| 01G01014700hEP0# | Bacteremia, GU or Reproductive Infection                    | Unknown        | Ghana | 3   |
| 01G01014900hEP0# | Parasitemia                                                 | Unknown        | Ghana | 3   |
| 01G01015400hEP0# | Parasitemia                                                 | Unknown        | Ghana | 3   |
| 01G01015700hEP0# | Respiratory Tract Infection                                 | Unknown        | Ghana | 3   |
| 01G01015800hEP0# | Cellulitis/Abscess/Skin/bone/ Joint Infection               | Unknown        | Ghana | 3   |
| 01G01015900hEP0# | Bacteremia                                                  | Unknown        | Ghana | 3   |
| 01G01016300hEP0# | Cellulitis/Abscess/Skin/bone/ Joint Infection               | Unknown        | Ghana | 3   |
| 01G01016900hEP0# | Cellulitis/Abscess/Skin/bone/ Joint Infection               | Unknown        | Ghana | 3   |
| 01G01017200hEP0# | Parasitemia                                                 | Unknown        | Ghana | 3   |
| 01G01017400hEP0# | GU or Reproductive Infection                                | Unknown        | Ghana | 3   |
| 01G01017800hEP0# | Cellulitis/Abscess/Skin/bone/ Joint Infection               | Unknown        | Ghana | 3   |
| 01G01018300hEP0# | Cellulitis/Abscess/Skin/bone/ Joint Infection , Parasitemia | Unknown        | Ghana | 3   |
| 01G01019200hEP0# | Respiratory Tract Infection                                 | Unknown        | Ghana | 3   |
| 01G01 9029       | Healthy Control                                             | Not applicable | Ghana | 2&3 |
| 01G01 9030       | Healthy Control                                             | Not applicable | Ghana | 2&3 |
| 01G01 9031       | Healthy Control                                             | Not applicable | Ghana | 2&3 |
| 01G01 9032       | Healthy Control                                             | Not applicable | Ghana | 2&3 |
| 01G01 9033       | Healthy Control                                             | Not applicable | Ghana | 2&3 |
| 01G01 9034       | Healthy Control                                             | Not applicable | Ghana | 2&3 |
| 01G01 9035       | Healthy Control                                             | Not applicable | Ghana | 2&3 |
| 01G01 9036       | Healthy Control                                             | Not applicable | Ghana | 2&3 |
| 01G01 9037       | Healthy Control                                             | Not applicable | Ghana | 2&3 |
| 01G01 9038       | Healthy Control                                             | Not applicable | Ghana | 2&3 |
| 01G01 9040       | Healthy Control                                             | Not applicable | Ghana | 2&3 |
| 01G01 9045       | Healthy Control                                             | Not applicable | Ghana | 2&3 |
| 01G01 9046       | Healthy Control                                             | Not applicable | Ghana | 2&3 |
